# Supplementary material
Source: PubMed Central journal article supplement (PMC2725751)
Supplement: mend_me.2007-0237_1.pdf [file mend_me.2007-0237_1.pdf]

**Supplementary Table 1** The nucleotide sequences used for plasmid construction

| Constructs             | Nucleotide Sequences                                                         |
|------------------------|------------------------------------------------------------------------------|
| ATP6v0d2-Luc           | 5'-GGTACCTCTTTGCCTGTCAACCTAAACTTC-3'<br>5'-CTCGAGGCTCCGAGTCCTGGATAGCAACTG-3' |
| DC-STAMP-Luc           | 5'-GGTACCTCAATACATAAATGGCTCCTACAG-3'<br>5'-CTCGAGTTCCGCTTAGGTTCCCTCCACAAG-3' |
| $\beta$ 3-Integrin-Luc | 5'-GGTACCTCACATTGGTCCAGCAAGCACTC-3'<br>5'-CTCGAGTTGTCCCGGCCACTGCGCTCG-3'     |

**Supplementary Table 2** The nucleotide sequences used for RT-PCR

| Genes               | Nucleotide Sequences                                                                      |
|---------------------|-------------------------------------------------------------------------------------------|
| NFATc1              | 5'-CTCGAAAGACAGCACTGGAGCAT-3' (forward)<br>5'-CGGCTGCCTTCCGTCTCATAG-3' (reverse)          |
| OSCAR               | 5'-CTGCTGGTAACGGATCAGCTCCCCAGA-3' (forward)<br>5'-CCAAGGAGCCAGAACCCTTCGAAACT-3' (reverse) |
| CD9                 | 5'-AAGTGCATCAAATACCTGCTCTTC-3' (forward)<br>5'-GCATGCACTGGGACTCTTGACAG-3' (reverse)       |
| CD44                | 5'-GGACTCCAGGGGGAGTCCCGCAC-3' (forward)<br>5'-CGTCCCATTGCCACCGTTGATCAC-3' (reverse)       |
| E-cadherin          | 5'-ATCCTCGGAATCCTTGGAGGGATC-3' (forward)<br>5'-GGGGTCGCTGTCGGCTGCCTTCAG-3' (reverse)      |
| meltrin- $\alpha$   | 5'-CCCGCCAGTCCTGCAGTCAGGCAG-3' (forward)<br>5'-GTGGGAAGGTCTGGGTACTTGATG-3' (reverse)      |
| MFR                 | 5'-AAATCAGTGTCTGTTGCTGCTGG-3' (forward)<br>5'-CTGGGGTGACATTACTGATAC-3' (reverse)          |
| ATP6v0d2            | 5'-TCAGATCTCTTCAAGGCTGTGCTG-3' (forward)<br>5'-GTGCCAAATGAGTTCAGAGTGATG-3' (reverse)      |
| DC-STAMP            | 5'-TGGAAGTTCACTTGAAACTACGTG-3' (forward)<br>5'-CTCGGTTTCCCGTCAGCCTCTCTC-3' (reverse)      |
| $\alpha$ v-Integrin | 5'-CCTCAGAGAGGGAGATGTTACAC-3' (forward)<br>5'-AACTGCCAAGATGATACCCACAC-3' (reverse)        |
| $\beta$ 3-Integrin  | 5'-GATGACATCGAGCAGGTGAAAGAG-3' (forward)<br>5'-CCGGTCATGAATGGTGATGAGTAG-3' (reverse)      |
| c-Src               | 5'-TTCAACAGCCTGCAGCAGCTCGTG-3' (forward)<br>5'-TTCCGACACCACAGCATACAGCTG-3' (reverse)      |
| cathepsin K         | 5'-ACGGAGGCATTGACTCTGAAGATG-3' (forward)<br>5'-GTTGTTCTTATTCCGAGCCAAGAG-3' (reverse)      |
| TRAP                | 5'-CTGGAGTGCACGATGCCAGCGACA-3' (forward)<br>5'-TCCGTGCTCGGCGATGGACCAGA-3' (reverse)       |
| HPRT                | 5'-GTAATGATCAGTCAACGGGGGAC-3' (forward)<br>5'-CCAGCAAGCTTGCAACCTTAACCA-3' (reverse)       |

**Supplementary Table 3** The nucleotide sequences used for ChIP assay

| Genes              | Nucleotide Sequences                                                                       |
|--------------------|--------------------------------------------------------------------------------------------|
| DC-STAMP           | 5'-CTTCAGAGCTATGGGCTCATCCAG-3' (forward)<br>5'-CTCGAGTTCCGCTTAGGTTCCCTCCACAAG-3' (reverse) |
|                    | 5'-AACTCGGTTTCTTTTTTATCTCTAG-3' (intron)<br>5'-GACAGAACGGCCAGAAGAATGAAG-3' (exon)          |
| ATP6v0d2           | 5'-CAGGTGGATTTCTGAGAGTTCCAG-3' (forward)<br>5'-GCCCAGTTTGGCCAGTGACACCAG-3' (reverse)       |
|                    | 5'-CAAAGTCTAAGAAGTTCGCGAGTG-3' (intron)<br>5'-ATAGCTGCATGTCATGTAGGTGAG-3' (exon)           |
| $\beta$ 3-Integrin | 5'-TCACTGTGTAGAGTAATGAAATAC-3' (forward)<br>5'-CCATCTGACTGACCTTCCTTCCTC-3' (reverse)       |
| OSCAR              | 5'-GAACACCAGAGGCTATGACTGTTC-3' (forward)<br>5'-CCGTGGAGCTGAGGAAAAGGTTG-3' (reverse)        |
